# Supplementary material for: Nkx2.1 regulates the generation of telencephalic astrocytes during embryonic development
Source: PubMed Central journal article supplement (PMC5339799; doi:10.1038/srep43093), 2017-03-07
Supplement: srep43093-s1.pdf [file srep43093-s1.pdf]

## Supplementary information

### **Nkx2.1 regulates the generation of telencephalic astrocytes during embryonic development**

Shilpi Minocha<sup>1\*</sup>, Delphine Valloton<sup>1\*</sup>, Yvan Arsenijevic<sup>2</sup>, Jean-René Cardinaux<sup>3</sup>, Raffaella Guidi<sup>3</sup>, Jean-Pierre Hornung<sup>1</sup>, and Cécile Lebrand<sup>1, ✉</sup>.

<sup>1</sup> Department of Fundamental Neurosciences, University of Lausanne, Rue du Bugnon 9, CH-1005 Lausanne, Switzerland.

<sup>2</sup> Department of Ophthalmology, University of Lausanne, Hôpital ophtalmique Jules-Gonin, Av. de France 15, CH-1004 Lausanne, Switzerland.

<sup>3</sup> Department of Psychiatry, Center for Psychiatric Neuroscience, Lausanne University Hospital, Prilly, CH-1008 Lausanne, Switzerland.

✉: Correspondence to Dr. Cécile Lebrand, Department of Fundamental Neurosciences, University of Lausanne, Rue du Bugnon 9, 1005 Lausanne, Switzerland. Telephone: +41 21 692 51 30. Fax: +41 21 692 51 05.

Email: [cecile.lebrand@unil.ch](mailto:cecile.lebrand@unil.ch).

# E16.5 / Hoechst / **Nkx2.1** / **GLAST**

***Cspg4-cre+/Rosa-EYFP***

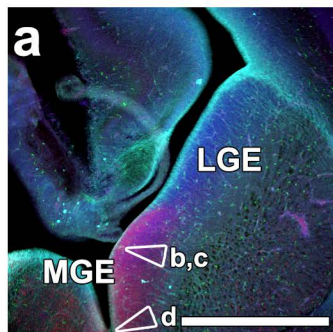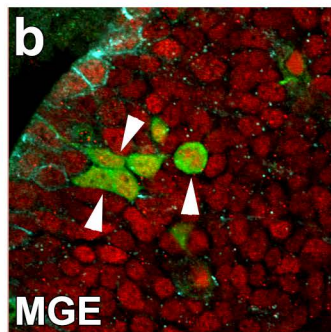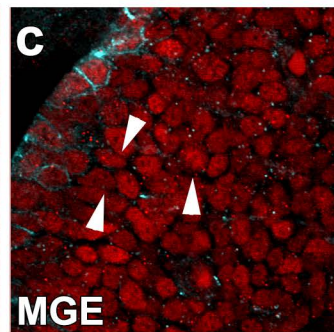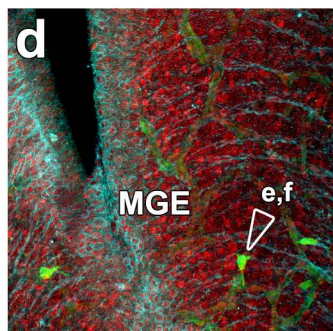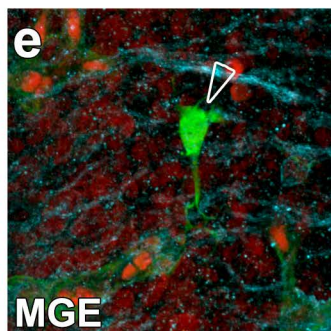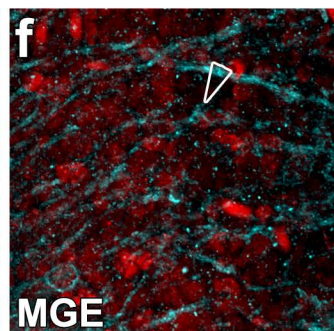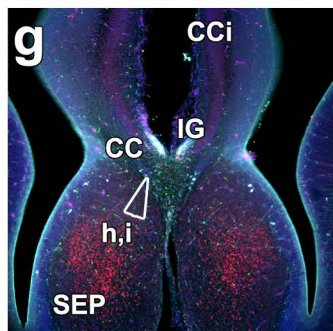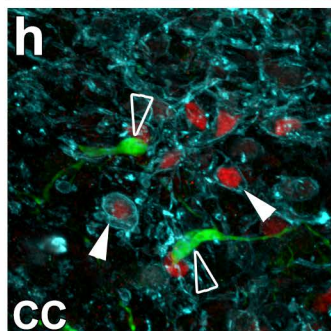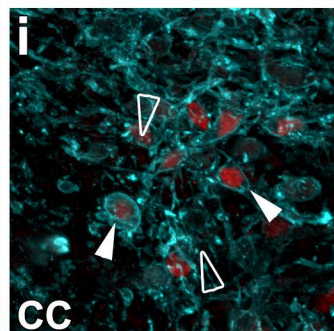

1 **Supplementary Figure S1. Fate-mapping study of *Nkx2.1*-regulated NG2<sup>+</sup> glia**  
2 **using the *Cspg4-Cre<sup>+</sup>/Rosa-EYFP* reporter mice.**

3 **(a-i)** Triple immunohistochemistry for the EYFP, *Nkx2.1* and GLAST on coronal  
4 sections from *Cspg4-Cre<sup>+</sup>/Rosa-EYFP* mice (n=3) at E16.5. Cell nuclei were  
5 counterstained in blue with Hoechst (**a** and **g**). **b, c, e, f, h** and **i** are higher power  
6 views of the regions shown in **a, d** and **g**, respectively. At E16.5, NG2<sup>+</sup> (or *Cspg4*<sup>+</sup>)  
7 glia visualized by the EYFP signal were found to originate from *Nkx2.1*<sup>+</sup> subpallial  
8 sites such as the MGE (**a-c** and **d-f**). The colocalization between *Nkx2.1* (in red) and  
9 the EYFP signal (in green) is observed in few cells in the SVZ of the MGE (solid  
10 arrowheads in **b** and **c**) but as soon as the NG2<sup>+</sup> cells start to differentiate and migrate,  
11 *Nkx2.1* is down-regulated and is no anymore more visible (open arrowheads in **e-f**  
12 and **h-i**). By contrast, *Nkx2.1* is still expressed in GLAST<sup>+</sup> astroglial cells within the  
13 CC midline (solid arrowheads in **h-i**).

14 **(CC)** corpus callosum; **(CCi)** cingulate cortex; **(CI)** cingulate bundle; **(IG)** induseum  
15 griseum; **(MGE)** medial ganglionic eminence; **(SEP)** septum.

16 Bar = 675  $\mu$ m in **a** and **g**; 160  $\mu$ m in **d**, 40  $\mu$ m in **b, c, e, f, h** and **i**.

# Wild-type Mice

E16.5 / **Nkx2.1** / **GLAST** / **Hoechst**

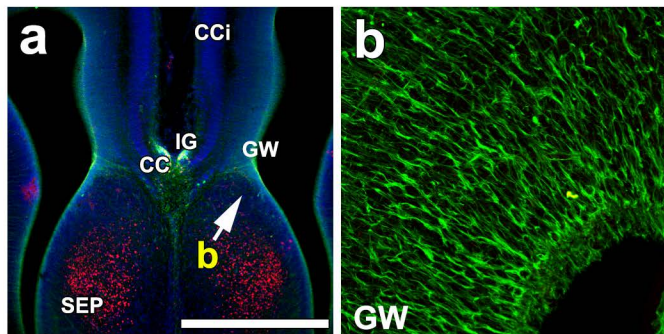

E18.5 / **NG2** / **PDGFR $\beta$**

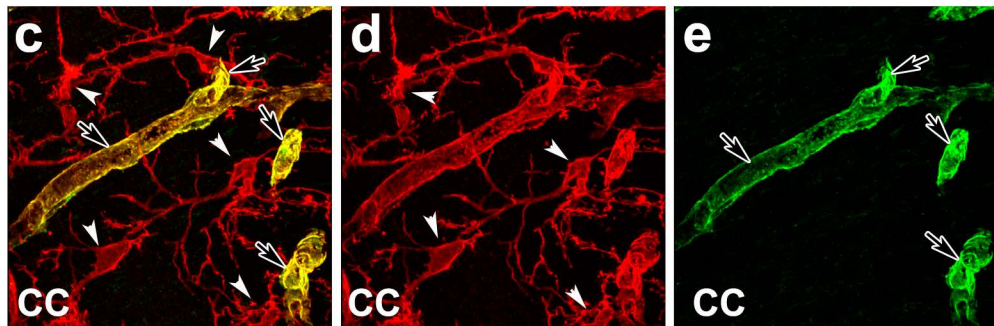

17 **Supplementary Figure S2. Radial glial cells within glial wedge region are**  
18 **Nkx2.1-negative and NG2 immunostaining can be used to clearly identify the**  
19 **NG2 glia**

20 **(a-b)** Double immunostaining for Nkx2.1 and GLAST on coronal sections from WT  
21 mice (n=3) at E16.5. Cell nuclei were counterstained in blue with Hoechst **(a)**. **b** is  
22 higher power view of the regions shown in **a**. The GLAST<sup>+</sup> radial glial cells within  
23 glial wedge **(GW)** do not express Nkx2.1.

24 **(c-e)** Double immunostaining for NG2 and PDGFR $\beta$  on coronal sections from WT  
25 mice (n=3) at E18.5. Though PDGFR $\beta$ <sup>+</sup> pericytes adjacent to the vessels are NG2<sup>+</sup>  
26 (arrows), they can be clearly differentiated from NG2 glia (white arrowhead) due to  
27 substantial difference in morphology.

28 **(CC)** corpus callosum; **(CCi)** cingulate cortex; **(GW)** glial wedge; **(IG)** induseum  
29 griseum; **(SEP)** septum.

30 Bar = 675  $\mu$ m in **a** and 40  $\mu$ m in **b, c-e**.

Wild-type E18.5

GFAP

GLAST

GLAST / GFAP

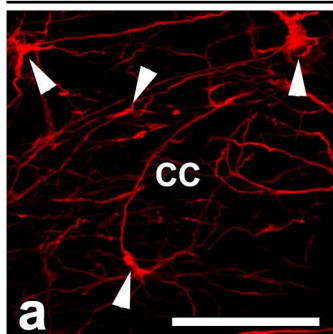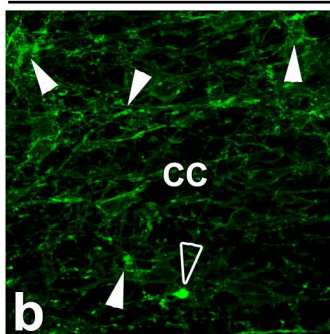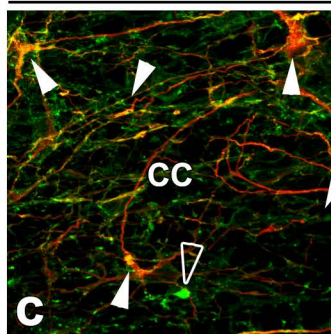

GFAP

S100 $\beta$

GFAP / S100 $\beta$

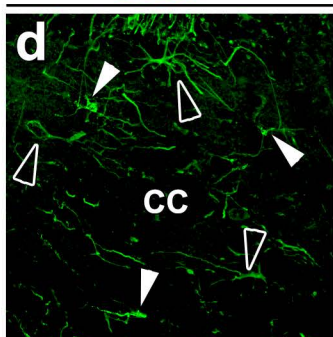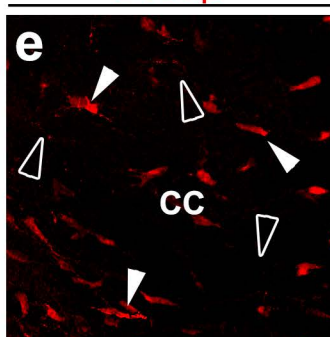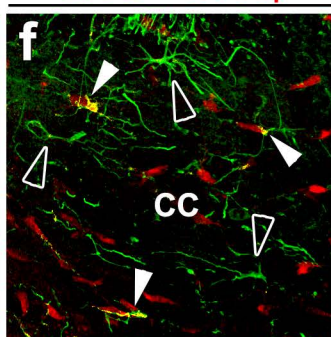

YFP

GFAP

Hoechst / GFAP

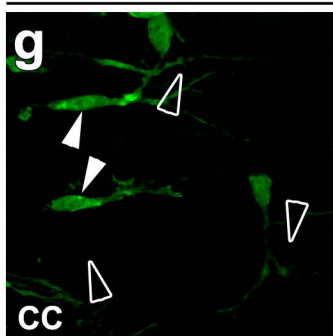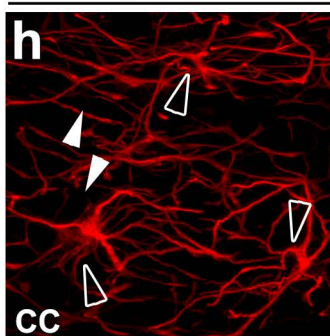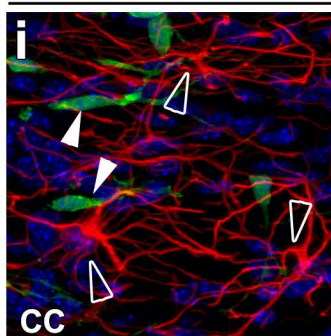

YFP

S100 $\beta$

Hoechst / S100 $\beta$

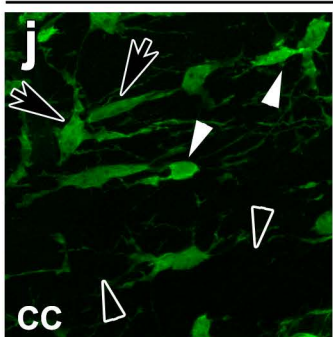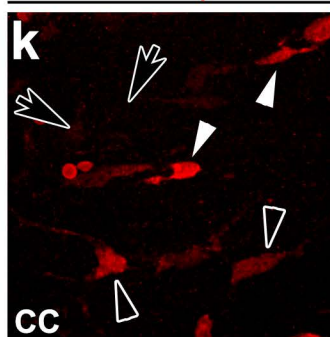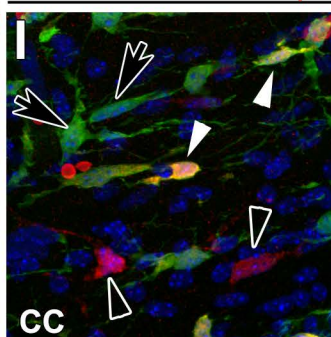

Cspg4-cre+/Rosa-EYFP

31 **Supplementary Figure S3. Characterization of glial subtypes in mouse**  
32 **embryonic brain.**

33 **(a-f)** Double immunostaining for GFAP and GLAST (a-c) (n=3) and GFAP and  
34 S100 $\beta$  (d-f) (n=3) on coronal sections from WT mice (n=3) at E18.5. **(a-c)** The  
35 GFAP<sup>+</sup> glia co-express GLAST (closed arrowheads) whereas some glia are positive  
36 for GLAST alone (open arrowhead). **(d-f)** Some GFAP<sup>+</sup> glia co-express S100 $\beta$   
37 (closed arrowheads) while several others do not express S100 $\beta$  (open arrowheads).  
38 Also, several S100 $\beta$ <sup>+</sup> cells do not express GFAP.

39 **(g-l)** Double immunostaining for YFP and GFAP (g-i) (n=3) and YFP and S100 $\beta$  (j-  
40 l) (n=3) on coronal sections of *Cspg4-cre*<sup>+</sup>/*Rosa-EYFP* mice (n=3) at E18.5. **(g-i)**  
41 The NG2-derived glia, depicted by YFP staining (white arrowheads), do not express  
42 GFAP. The GFAP<sup>+</sup> glia (open arrowheads) and NG2<sup>+</sup> glia (closed arrowheads) are  
43 two distinct mutually exclusive populations. **(j-l)** Some NG2-derived glia co-express  
44 S100 $\beta$  (closed arrowheads) while several others do not express S100 $\beta$  (open arrows).  
45 Also, several S100 $\beta$ <sup>+</sup> cells are not part of the NG2-derived population (open  
46 arrowheads).

47 **(CC)** corpus callosum.

48 Bar = 40  $\mu$ m.

49

E16.5 / Hoechst / **caspase3**E16.5 / Hoechst / **TUNEL*****Nkx2.1*<sup>+/+</sup>**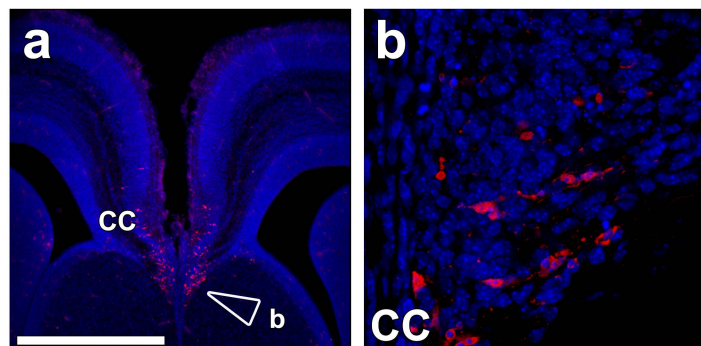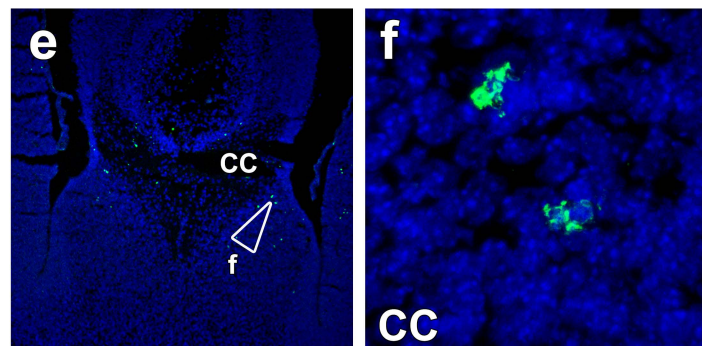***Nkx2.1*<sup>-/-</sup>**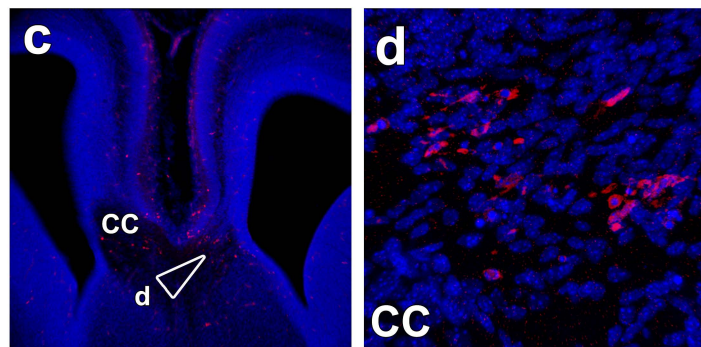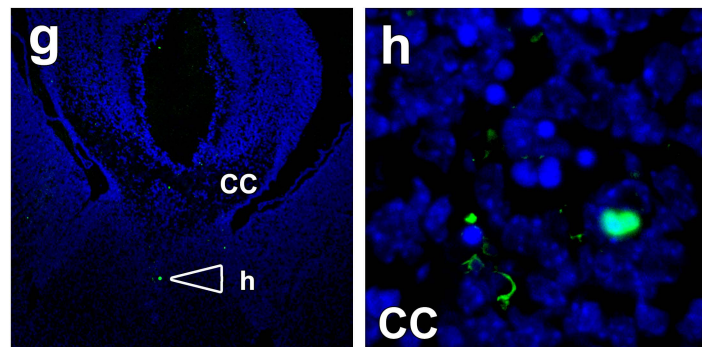**i** **Cleaved-caspase 3****j** **TUNEL**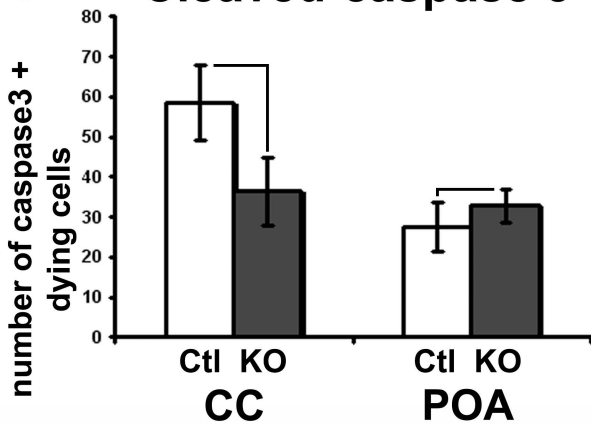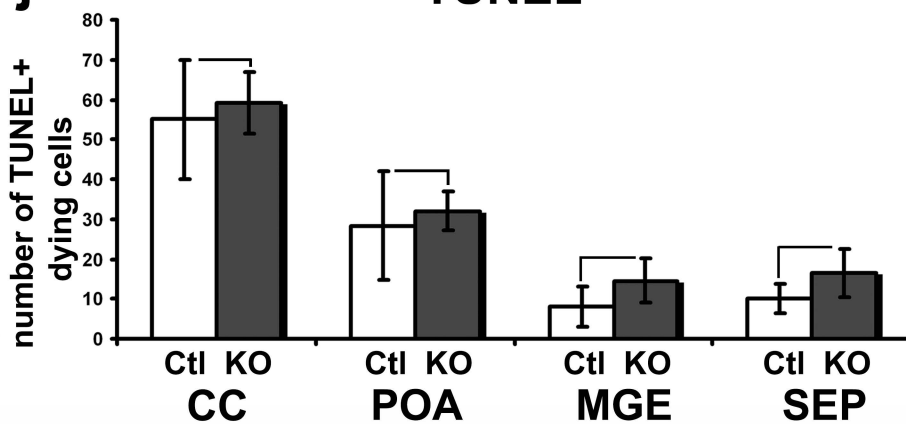



50 **Supplementary Figure S4. *Nkx2.1*<sup>-/-</sup> mice brains do not show any increase in cell**  
51 **death at E16.5.**

52 **(a-d)** Single immunohistochemical staining for the cleaved-caspase 3 (n=4 for CC  
53 region and n= 5 for POA region in *Nkx2.1*<sup>+/+</sup> or *Nkx2.1*<sup>+/-</sup> controls (Ctl); n=6 for CC  
54 region and n=10 for POA region in *Nkx2.1*<sup>-/-</sup> mice) and **(e-h)** TUNEL staining (n=16  
55 for CC in Ctl mice, n=22 for CC in *Nkx2.1*<sup>-/-</sup> mice; n=6 for POA in Ctl mice, n=5 for  
56 POA in *Nkx2.1*<sup>-/-</sup> mice; n=10 for MGE in Ctl mice, n= 11 for MGE in *Nkx2.1*<sup>-/-</sup> mice;  
57 n=7 for SEP in Ctl mice, n=14 for SEP in *Nkx2.1*<sup>-/-</sup> mice) on CC coronal sections  
58 from Ctl **(a-b and e-f)** and *Nkx2.1*<sup>-/-</sup> mice **(c-d and g-h)** at E16.5. Cell nuclei were  
59 counterstained in blue with Hoechst. **b, d, f and h** are higher magnified views of the  
60 CC region seen in **a, c, e and g**, respectively. **(i and j)** Bars (mean ± SEM from a  
61 sample of n=4-16 sections in the Ctl and n=5-22 sections in *Nkx2.1*<sup>-/-</sup> mice  
62 depending on the region studied) represent the number of dying cells labelled by the  
63 cleaved-caspase 3 or by the TUNEL staining and displaying pyknotic nuclei per  
64 section (surface area/section=24119.332 mm<sup>2</sup>), in the CC, POA, MGE and SEP of  
65 *Nkx2.1*<sup>-/-</sup> (KO) compared to *Nkx2.1*<sup>+/+</sup> or *Nkx2.1*<sup>+/-</sup> controls (Ctl). No significant  
66 differences were observed in the number of dying cells in *Nkx2.1*<sup>-/-</sup> mice brains  
67 compared to the Ctl. p-value= 0.1225 for CC and 0.4618 for POA with cleaved  
68 caspase 3 staining. p-value= 0.7934 for CC, 0.8193 for POA, 0.4032 for MGE, and  
69 0.4879 for SEP with TUNEL staining.

70 **(CC)** corpus callosum; **(MGE)** medial ganglionic eminence; **(POA)** preoptic area;  
71 **(SEP)** septum.

72 Bar = 675 µm in **a, c, e and g**; 60 µm in **b and d**; 40 µm in **f and h**.

73

A.

ataaaagcagcccacggggctgcccttgccatagcctcactggcggcag  
agaacaaggctctattcagcgagtagcctggagtagacaccagaagcca  
agcatgggcagaggaaggcaggggttggggggagcagagctgtctgtgtt  
ccagaagcccaaggacacagatggctaaggcgcctgggagagggacctga  
gtggaagagatagatgggcctgaagtctcaagcagcaacagcctcctccc  
cgccattggtgaggggtggggtttgggtttcccggaacctacatatccctcag  
aggcctggtgtgtaggaatataaagggggtaaatctcctgagagaatgag  
gggtaccaggaagacgggggttacagaaagaaagactccagcatgcac  
agccaactcattcaaaactactctgtcaggggctgccaggggccaggtc  
gggggtgggggtggggggcaacgagaagctggatcagggagaaatggccc  
actaggctggataagaggccacagaggggctcaggaatgaagcctgctgt  
cttaccctattaggatctgctgcataccttctgcccgtgactctaaaca  
cacagccagaggctcaagttagccctggagtcacagagagggctccaacc  
ttagccctccactcctgaactccaggaatgagaagatagagttggagaga  
ttcaggggagaggactctgttgagaatgggggtcacaggaaactgtaata  
taggttgatcccggaggaaggaataggttcttcaagttcctagcatctc  
acaggccccagagaaggacagagttgggggtggtcctggcttacaggctc  
taagaactggaagctgattacccaccgagctgtgactctctgtctctg  
tctctgtgtgtgctcgtgcacacttatcacacaaatggtcatgtgtgt  
gcacatacatgtgttgagaccagaggtcaacctcaggcactggtgccttg  
gttttctgagagagcatttctctctggatctggaactcgccaattagtg  
gagccaggaagtctgctgattttcactgccagcactggagtttacaagt  
atgcactgtcaaccaggccttttgtattcattctgcagctagaacttgg  
gtgggtcttcatgcttgacaggcaagcaatattatggactaagctgttccc  
tcggccctctcttgaccatttaccagaaagggggttcccttgatcaatgg  
cgaagccaggctggtgttccaagaaagccttgactctgggtacagtgac  
ctcagtggggtgagaggagttctccccctagctgggctggggcccagctc  
caccctcaggctattcaatgggggtgcttccaggaagtcaggggcaga  
tttagtccaaccgctcctccataaaggccctgacatcccaggagccagc  
ATGGAGCGGAGACGCA

B.

gtctgtaagctgaagacctggcagtgctgagctggtcagccccaggacctccttttggtgccacgagtgatca  
ccttggcatagacataatggtcaggggtgggcacgcagcctgcttcccgtgtgctccaggcctccttcgatgct  
ttccgagaagtctattgagctgggagcttgtactgcacccggggctgacatcctggcatcctgggataaaagcag  
cccacggggctgcccttgccatatgcctcactggcggcagagaacaaggctctattcagcgagtaccctggagta  
gacaccagaagcccaagcatgggcagaggaaggcaggggttggggggagcagagctgtctgtgttccagaagccc  
aaggacacagatggctaaggcgcctgggagagggacctgagtggaagagatagatgggcctgaagtctcaagcag  
caacagcctcctccccgccattggtgaggggtggggttgggttccccggacctacatatccctcagaggcctgggtg  
tgtaggaatataagggggtaaatctcctgagagaatgaggggtaccagggaagacgggggttacagaaagaaa  
gactccagcatgcacagccaactcattcaaaactactctgtcaggggctgccaggggccaggctcgggggtggggg  
gtggggggcaacgagaagctggatcagggagaaatggcccactaggctggataagaggccacagaggggctcagg  
aatgaagcctgctgtcttaccctattaggatctgcgtgcataccttctgccgtgactctaaacacacagccaga  
ggctcaagtgaccctggagtcacagagagggtccaaccttagccctccactcctgaactccaggaatgagaag  
atagagttggagagattcaggggagaggactctgttgagaatgggggtcacaggaaactgtaatataggtgatc  
ccggaggaaggaataggttcttcaagttcctagcatctcacaggccccagagaaggacagagttgggggtggtc  
ctggcttacaggctctaagaactggaagctgattacccaccgagctgtgcactctctgtctctgtctctgtgtg  
tgcgctcgtgcacacttatcacacaaatgttcatgtgtgtgcacatacatgtgttgagaccagaggtcaacctca  
ggcactgttgcccttgggtttctgagagagcatttctctctggatctggaactcgccaattagtgagagccaggaa  
gtctgctgattttcactgcccagcactggagtttacaagtatgcactgtcaaccaggccttttgtattcattct  
gcagctagaacttgggtgggtcttcatgcttgacaggcaagcaatttatggactaagctgttccctcgccctct  
cttgaccatttaccagaaagggggttcccttgatcaatggcgaagccaggctgggtgttccaagaaagccttgac  
tctgggtacagtgacctcagtggggtgagaggagttctccccctagctgggctggggcccagctccacccccctca  
ggctattcaatgggggtgcttccaggaagtcaggggcagatthagtccaaccggttccataaaggccctgac  
atcccaggagccagcagagggcagggcacc

74 **Supplementary Figure S5. The scheme of GFAP promoter with putative Nkx2.1**  
75 **binding site and primers used for ChIP assay.**

76 **A.** GFAP promoter sequence is shown with putative Nkx2.1 binding site in bold red  
77 font at position –838 bp relative to the putative transcriptional start site (shown in  
78 uppercase). The forward and reverse primers 5'- tggataagaggccacagagg and 5'-  
79 cctctcccctgaatctctcc that were used for ChIP assay are underlined.

80 **B.** GFAP promoter sequence from the *pDRIVE-mGFAP-LacZ* plasmid used for  
81 transfection experiments shown in Figure 9d-i. The putative Nkx2.1 binding site is  
82 shown in bold red font.
